# Supplementary material
Source: ML conference proceedings conference paper supplement (https://openreview.net/forum?id=4011PUI9vm)
Supplement: supplementary_material [file attachment]

## Sheet: Form Responses 1
			Based on the explanation and your intuition, reorder the above documents from most important to least important.	Based on your intuition, guess the query that led to the above ordering.	Based on the explanation and your intuition, reorder the above documents from most important to least important.	Based on your intuition, guess the query that led to the above ordering.	Based on the explanation, reorder the above documents from most important to least important.	Based on your intuition, guess the query that led to the above ordering.	Based on the explanation and your intuition, reorder the above documents from most important to least important.		Based on the explanation and your intuition, reorder the above documents from most important to least important.	Based on your intuition, guess the query that led to the above ordering.	Based on the explanation and your intuition, reorder the above documents from most important to least important.	Based on your intuition, guess the query that led to the above ordering.	Based on the explanation and your intuition, reorder the above documents from most important to least important.		Based on the explanation and your intuition, reorder the above documents from most important to least important.	Based on your intuition, guess the query that led to the above ordering.	Based on the explanation and your intuition, reorder the above documents from most important to least important.	Based on your intuition, guess the query that led to the above ordering.	Based on the explanation and your intuition, reorder the above documents from most important to least important.
			3, 5, 1, 4, 2	US Army job qualifications	3, 2, 1, 4, 5	How fast is a cheetah	3, 5, 4, 2, 1	iconic Dior bag for a lady	2, 3, 5, 1, 4		2, 1, 4, 5, 3	speak now album	1, 3, 4, 2, 5	Zal Irani Ranji trophy match	4, 3, 1, 2, 5		4, 1, 3, 2, 5	homestead exemption	2, 5, 3, 1, 4	US president with most children	5, 1, 3, 4, 2
			2, 4, 3, 1, 5	age, weight, citizen, married, children requirements for becoming a Chaplain	3,2,1,4,5	top accelation(sp?) monitor speed for Cheetah with disease	4, 3, 1, 2, 5	iconic Christian Dior house Diana cannage tote	4, 1, 5, 3, 2		2, 1, 4, 5, 3	international aclaim for taylor swift never grow up on speak now album	3, 1, 4, 2, 1	oldest India cricket Zal Irani Ranji Trophy incomprehensible English sailor	2, 3, 4, 1, 5		4, 1, 3, 2, 5	are older homestead owners exempt from electricity and residence tax or jury duty	2, 5, 3, 1, 4	U.S. president with most wives and illegitimate children and grandchildren 15	2, 1, 3, 5, 4
			2,3,4,5,1	how to become an Army chaplain	1,2,3,4,5	how fast can a cheetah run	4,3,1,5,2	history behind Lady Dior bag	2,3,4,1,5		2,1,4,5,3	story behind Taylor Swift's Never Grow Up song	1,3,4,2,5	early history of cricket in India	4,1,2,3,5		1,3,4,5,2	what are the exemptions people of certain age(65 or above) are receiving?	1,3,2,5,4	some facts about US Presidents and their immediate families	1,5,4,3,2
			1 5 3 2 4	What are the requirements to join US army as a chaplain?	1 3 2 4 5	How fast cheetah can accelate its speed to the max possible?	1 4 3 5 2	Lady Dior bag	2 3 5 1 4		2 4 1 5 3	Story behind Taylor Swift â Never Grow Up	1 3 2 4 5	Ranji Trophy cricket India	1 3 4 2 5		4 1 2 3 5	Homestead exemption for older people?	2 5 1 3 4	US president with most children	1 5 4 3 2
			4,3,2,1,5	requirements for Army Chaplian	1,3,2,4,5	Speed of Cheetah	5,4,1,3,2	Lady Dior bag	4,1,3,2,5		35421	Taylor Swift Never Grow Up meaning lyrics Russian version Navsegda Speak Now album review Pronounce Names Jago audio video pronunciation	34125	Ranji Trophy history India cricket	14235		2 3 1 4 5	Standard deduction, jury exemption, homestead criteria, appliance energy	4,5,3,1,2	US presidents pets and children	1,4,3,5,2
			5 3 1 4 2	Physical requirements to join the army	3 2 1 5 4	Acceleration and topspeed of a cheetah	3 5 1 2 4	Cannage line from christian dior house	2 3 5 1 4		2 1 4 3 5	Taylor Swift never grow up speak now album	1 3 4 2 5	Zal irani trophy cricket match	3 4 2 1 5		4 3 1 2 5	Homestead tax exemptions for oldPeople	2 5 4 3 1	Us president with 15 children	5 1 3 2 4
			3,1,5,2,4	Requirements to enlist in army	2,1,3,4,5	Acceleration of Cheetah	4,5,3,2,1	What's the inspiration behind Dior?	2,3,4,1,5		2,1,4,5,3	Never Grow Up Lyrics	1,3,4,5,2	Zal Irani Trophy	3,2,4,5,1		1,2,3,4,5	Exemptions for older citizens in taxes	2,3,5,1,4	Which US president had the most children?	4,1,5,2,3
			(1,5,3,2,4)	Requirements to enlist in the army	(4,3,2,5,1)	How fast is a cheetah	(4,3,1,2,5)	Who made the Lady Dior bag	(2,3,4,1,5)		(2,1,4,3,5)	Whats a popular taylor swift song	(3,1,2,5,4)	Whats the history of cricket in india, and whats a popular league	(1,4,3,2,5)		(2,1,4,5,3)	Tax exemptions for older people living at a homestead	(2,3,5,1,4)	Which president had the most number of children	(1,5,4,3,2)
			1,5,3,2,4	qualifications to join the army	2,1,3,4,5	speed of a cheetah	3,5,1,2,4	the lady dior by christian dior	2,3,1,5,4		2,1,4,3,5	speak now never grow up	1,3,4,2,5	history of cricket in india	2,3,4,5,1		3,4,1,2,5	tax exemptions for old people	2,5,4,1,3	children of us presidents	1,4,5,3,2
			(1, 2, 3, 5, 4)	What are the requirements for joining US army?	(1, 3, 2, 4, 5)	Fastest animal in the world	(3, 1, 4, 5, 2)	Christian Dior signature product	(2, 4, 3, 1, 5)		(2, 1, 4, 5, 3)	Speak Now songs	(1, 3, 4, 2, 5)	first game of Ranji Trophy	(4, 2, 1, 3, 5)		(1, 3, 4, 2, 5)	how old can one be exempted from homestead tax?	(2, 5, 4, 1, 3)	which US president has 15 children?	(5, 1, 2, 4, 3)
			1,3,5,4,2	How to join the army?	1,3,2,5,4	spped of cheetah word problems	3,5,2,1,4	The Lady Dior	2,3,1,5,4		2,1,4,5,3	Taylor Swift Never Grow up meaning	1,3,4,2,5	History of cricket in India	4,3,2,1,5		4,1,3,2,5	tax exemptions for the older	2,3,1,4,5	15 most interesting facts about US Presidential families	5,1,4,3,2
			1,3,5,4,2	qualifications to be in the army	1,2,3,4,5	how fast is the cheetah?	1,2,3,4,5	Lady Dion Handbag	2,3,1,4,5		1,2,4,5,3	Never Grow up by Taylor Swift	1,2,3,4,5	What is the history of cricket in India?	1,2,3,4,5		1,3,4,2,5	What is the homestead tax?	1,2,3,4,5	Who were the children of US presidents?	1,4,5,3,2
			1, 5, 2, 4, 5	Requirement to get enlisted in US army	3, 1, 2, 5, 4	How to monitor the muscle acceleration of any animal e.g., Cheetah while in motion?	3, 4, 5, 1, 2	What is the most iconic work of Christian Dior that has historical significance? e?	2, 1, 5, 3, 4		2, 1, 5, 4, 3	what is the story behind never grow up song from the album speak now?	1, 3, 4 ,2, 5	Who played the first match in Zal Irani trophy?	4, 2, 1, 3, 5		1, 4, 3, 2, 5	What the exemption benefit I could get if I am older than 65 years?	2, 5, 4, 3, 1	Which US president has the most number of children?	1, 5, 4, 3, 2
			1, 3, 4, 5, 6	Highschool Age kids looking at requirements to enlist.	2, 3, 1, 4, 5	Top speed of cheetah	1, 4, 3, 2, 5	Lady Diana handbag dior	3, 2, 1, 4, 5		1, 4, 5, 2, 3	Lyrics for never grow up	3, 1, 4, 2, 5	India cricket trophy oldest	3, 1, 2, 4, 5		4, 1, 2, 3, 5	Homestead tax exemption	1, 3, 5, 2, 4	Weird presidential facts	1, 5, 3, 2, 4
